# Supplementary material
Source: publisher figshare collection journal article supplement (https://karger.figshare.com/ndownloader/files/12374147)
Supplement: Supplementary file 1 [file 12374147]

| Preparation | **WT** |  | **AMPK** |  | **WT** |  | **AMPK** |  | **WT** |  | **AMPK** |
| --- | --- | --- | --- | --- | --- | --- | --- | --- | --- | --- | --- |
| **LEAN** | | |  | **OBESE TO LEAN** | | |  | **OBESE** | | | |
| Thoracic aorta | 6.3±0.1 |  | 6.4±0.1 |  | 6.6±0.1***** |  | 6.7±0.2 |  | 6.6±0.2 |  | 6.7±0.1 |
| + L-NAME | 6.6±0.1 |  | 6.7±0.1 |  | 6.9±0.1***** |  | 6.8±0.1 |  | 6.7±0.1 |  | 6.7±0.1 |
|  |  | | |  |  | | |  |  | | | |
| Main renal artery | 5.9±0.1 |  | 6.3±0.0***** |  | 6.1±0.1 |  | 6.2±0.0 |  | 6.6±0.1**†** |  | 6.7±0.1**‡** |
| + L-NAME | 6.5±0.1 |  | 6.6±0.1 |  | 6.8±0.0***** |  | 6.7±0.1 |  | 7.4±0.1***** |  | 7.2±0.1**‡** |
